# Supplementary material
Source: PubMed Central journal article supplement (PMC6046260)

**A**

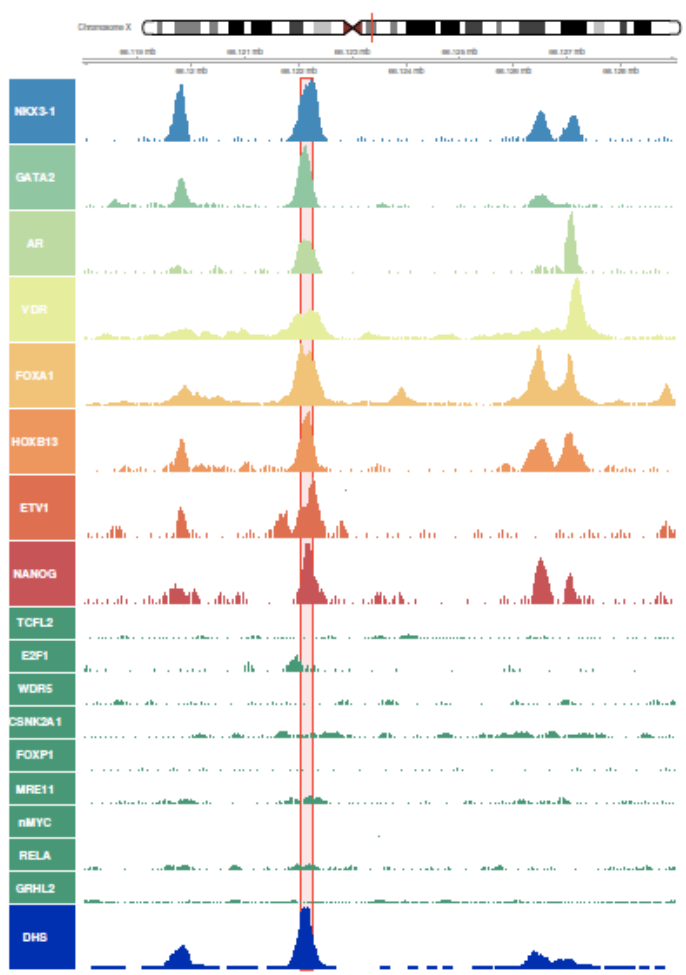

**B**

| No. | CistromeDB ID | factor  | cell line | number of peaks | Peak called in enhancer |
|-----|---------------|---------|-----------|-----------------|-------------------------|
| 1   | 36252         | NKX3-1  | LNCaP     | 72826           | +                       |
| 2   | 54397         | GATA2   | LNCaP     | 47237           | +                       |
| 3   | 44310         | AR      | LNCaP     | 19146           | +                       |
| 4   | 55164         | VDR     | LNCaP     | 42422           | +                       |
| 5   | 50039         | FOXA1   | LNCaP     | 226422          | +                       |
| 6   | 56664         | HOXB13  | LNCaP     | 37875           | +                       |
| 7   | 39372         | ETV1    | LNCaP     | 22553           | +                       |
| 8   | 71756         | NANOG   | LNCaP     | 19384           | +                       |
| 9   | 43061         | TCF7L2  | LNCaP     | 22553           | -                       |
| 10  | 44312         | E2F1    | LNCaP     | 23003           | -                       |
| 11  | 48250         | WDR5    | LNCaP     | 3094            | -                       |
| 12  | 49193         | CSNK2A1 | LNCaP     | 8458            | -                       |
| 13  | 51750         | FOXP1   | LNCaP     | 17289           | -                       |
| 14  | 51838         | MRE11   | LNCaP     | 11067           | -                       |
| 15  | 70754         | nMYC    | LNCaP     | 42059           | -                       |
| 16  | 71231         | RELA    | LNCaP     | 8704            | -                       |
| 17  | 74841         | GRHL2   | LNCaP     | 9174            | -                       |

**C**

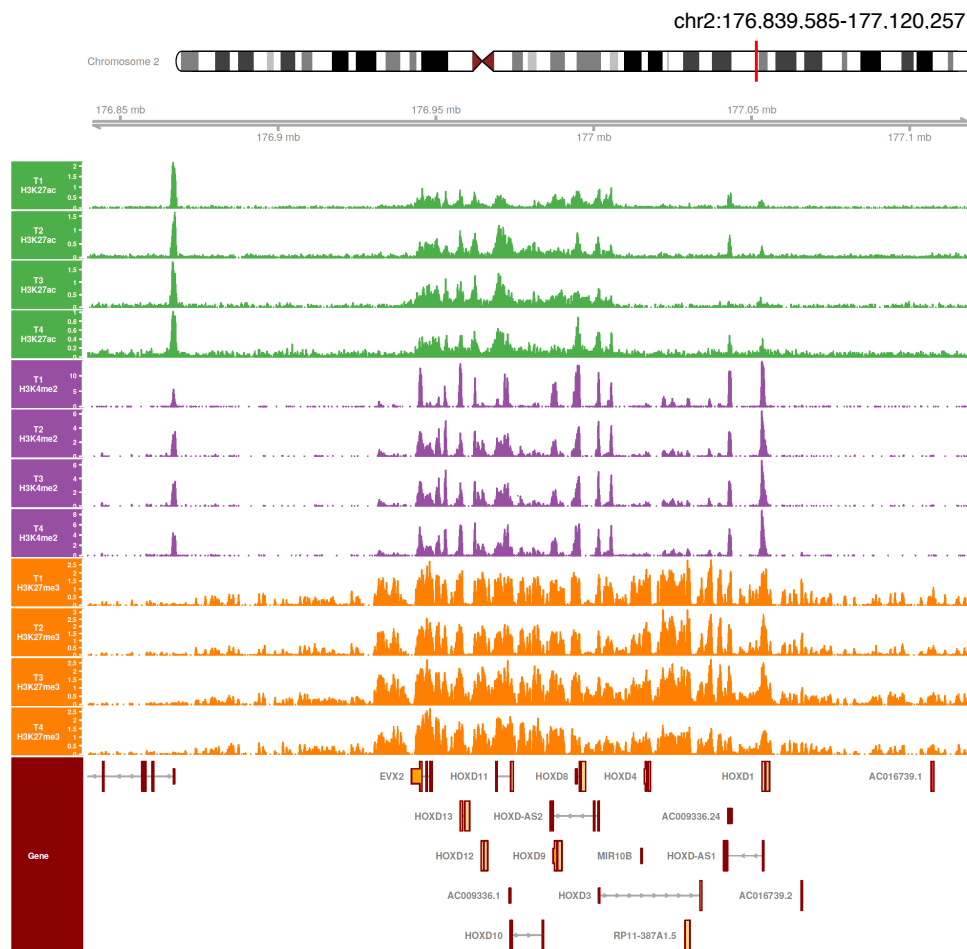

Supplement: NIHMS974232-supplement-4.pdf [file NIHMS974232-supplement-4.pdf]
