# Supplementary material
Source: PubMed Central journal article supplement (PMC6046260)
Supplement: NIHMS974232-supplement-5.pdf [file NIHMS974232-supplement-5.pdf]

**PRIMARY PROSTATE CANCER:**

**CASTRATE RESISTANT PROSTATE CANCER:**

TFs  
Vestigial Enhancer  
(H3K4me2-, H3K27Ac-, DNA hypomethylation)

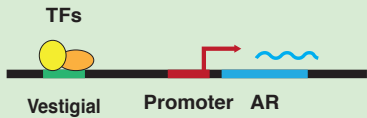

Androgen Deprivation Therapy

Active Enhancer  
H3K27Ac+

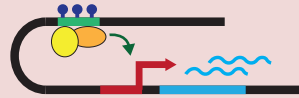

Epigenetic Activation

Amplification

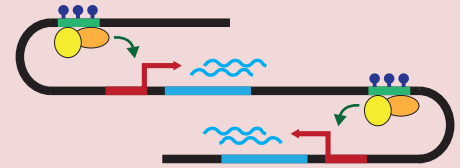

Enhancer and Gene Coamplification

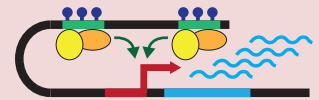

Enhancer Amplification
