# Supplementary material
Source: PubMed Central journal article supplement (PMC6046260)
Supplement: NIHMS974232-supplement-6.pdf [file NIHMS974232-supplement-6.pdf]

**Table S2: Primers Used, Related to STAR Methods**

| Name                                   | Sequence                   |
|----------------------------------------|----------------------------|
| GAPDH qRT-PCR fwd                      | CATGAGAAGTATGACAACAGCCT    |
| GAPDH qRT-PCR rev                      | AGTCCTTCCACGATACCAAAGT     |
| AR qRT-PCR fwd                         | GTGTCAAAGCGAAATGGGC        |
| AR qRT-PCR rev                         | GCTTCATCTCCACAGATCAGG      |
| KLK3 qRT-PCR fwd                       | GAGCAGCCCTATCAACCCCCTATT   |
| KLK3 qRT-PCR rev                       | AGCAACCCTGGACCTCACACCTAA   |
| TMPRSS2 qRT-PCR fwd                    | AAGGAATAGTGGATGACAGCG      |
| TMPRSS2 qRT-PCR rev                    | CAGCGTAAAGAAACCACTGC       |
| PLD1 qRT-PCR fwd                       | GAAAGCGTGACAGTGAAATGG      |
| PLD1 qRT-PCR rev                       | TCAAGATAGCCAAGGACAACC      |
| AMIGO2 qRT-PCR fwd                     | CAACATCACCAGCATTTCAC       |
| AMIGO2 qRT-PCR rev                     | TCACCGTCTTCAGCTTATTGG      |
| HPRT1 qRT-PCR fwd                      | TGCTGAGGATTTGGAAAGGG       |
| HPRT1 qRT-PCR rev                      | ACAGAGGGCTACAATGTGATG      |
| AR-FL (Full length) qRT-PCR fwd        | CAGCCTATTGCGAGAGAGCTG      |
| AR-FL (Full length) qRT-PCR rev        | GAAAGGATCTTGGGCACTTGC      |
| AR-V7 qRT-PCR fwd                      | CCATCTTGTCGTCTTCGGAATGTTA  |
| AR-V7 qRT-PCR rev                      | TTTGAATGAGGCAAGTCAGCCTTTCT |
| Endogenous specific AR qRT-PCR fwd     | TCACAGCCTGTTGAACTCTTC      |
| Endogenous specific AR qRT-PCR rev     | ACTGCACTTCCATCCTTGAG       |
| Exogenous specific AR qRT-PCR fwd      | GATGACGATAAGATGGCCCG       |
| Exogenous specific AR qRT-PCR rev      | ACGCTCTGGAACAGATTCTG       |
| HPRT gRNA sequence                     | CGCCGCGCGGGAAAGCCGAG       |
| Nontargeting control gRNA sequence     | CAACGAGAAGCGCGATCACA       |
| Knockin Primer Set 1 fwd               | GGCAAGAGAATCCCATTGCA       |
| Knockin Primer Set 1 rev (pre-Cre)     | GCTGTCCCTCGCTAGCATAA       |
| Knockin Primer Set 1 rev (post-Cre)    | GTGCCACCTTCTTTTACGC        |
| Knockin Primer Set 2 fwd               | GCTTTGGGAGTGAAGACGAG       |
| Knockin Primer Set 2 rev               | TTTGGGGTGTCTTTGGAAGG       |
| ChIP QPCR Peak2_1 fwd                  | ACAGGCAGACACAAAGGACA       |
| ChIP QPCR Peak2_1 rev                  | TCCCTCGTCCTCTCCTGTTA       |
| ChIP QPCR Peak2_2 fwd                  | CCAGACAGGCAAGCTTTCAG       |
| ChIP QPCR Peak2_2 rev                  | TGGGCAACTTCCAATGACTG       |
| ChIP QPCR Control_1 fwd                | CAGACACCCACTTCCATACAC      |
| ChIP QPCR Control_1 rev                | CTCAGGTTAGAACTTAGGGCAC     |
| ChIP QPCR Control_2 fwd                | CCTGGAGGGCTTGGAGAT         |
| ChIP QPCR Control_2 rev                | ATCCTACGGCTGGCTGTGA        |
| AR_P2_1196F                            | GTTGGTGCCACTGAGGATTT       |
| AR_P2_1196R                            | ACTGAAACCTGGGGCTTCTT       |
| 3C primers chrX:66,740,000-66,780,000: |                            |
| AR Promoter                            | ACACACGGTGGACAAGATCT       |
| BglII_ARprom_01                        | CCAGTGGAGATTTTGGAGCA       |
| BglII_ARprom_02                        | CGTGAATGAACTGAATCCTCA      |
| BglII_ARprom_03                        | GGGGTTCCTTTTGGAAAAAT       |
| 3C primers chrX:66,100,000-66,155,000: |                            |
| BglII_ARenh_01                         | GTGGGGAGGTCTCTCTTTGA       |

|                |                        |
|----------------|------------------------|
| BglII_ARenh_02 | AGAAAGGTGGAGCCTTAGCC   |
| BglII_ARenh_03 | TTGTGAGAATGAGGGAGGTTG  |
| BglII_ARenh_04 | AGAGGGCCCCTTTAAAAGTC   |
| BglII_ARenh_05 | CATTCAAATCTTGTGAGCCAAC |
| BglII_ARenh_06 | TTGGAACACACAGGGCTACA   |
| BglII_ARenh_07 | CACTTGAACAATGCTTGTC    |
| BglII_ARenh_08 | AACATGGCCCATTTAATCCA   |
| BglII_ARenh_09 | ACCTCCGATATGGCTCACC    |
| BglII_ARenh_10 | GAGCAAACCAAACCTGGAAGC  |
| BglII_ARenh_11 | GGGATGTGAGGCTGCTTTAG   |
| BglII_ARenh_12 | AGACTGGCAAGTTGGGAAAA   |
| BglII_AR_Neg   | GATTGGTCATCAGGCAGACA   |
