# Supplementary material
Source: PubMed Central journal article supplement (PMC6046260)

**A**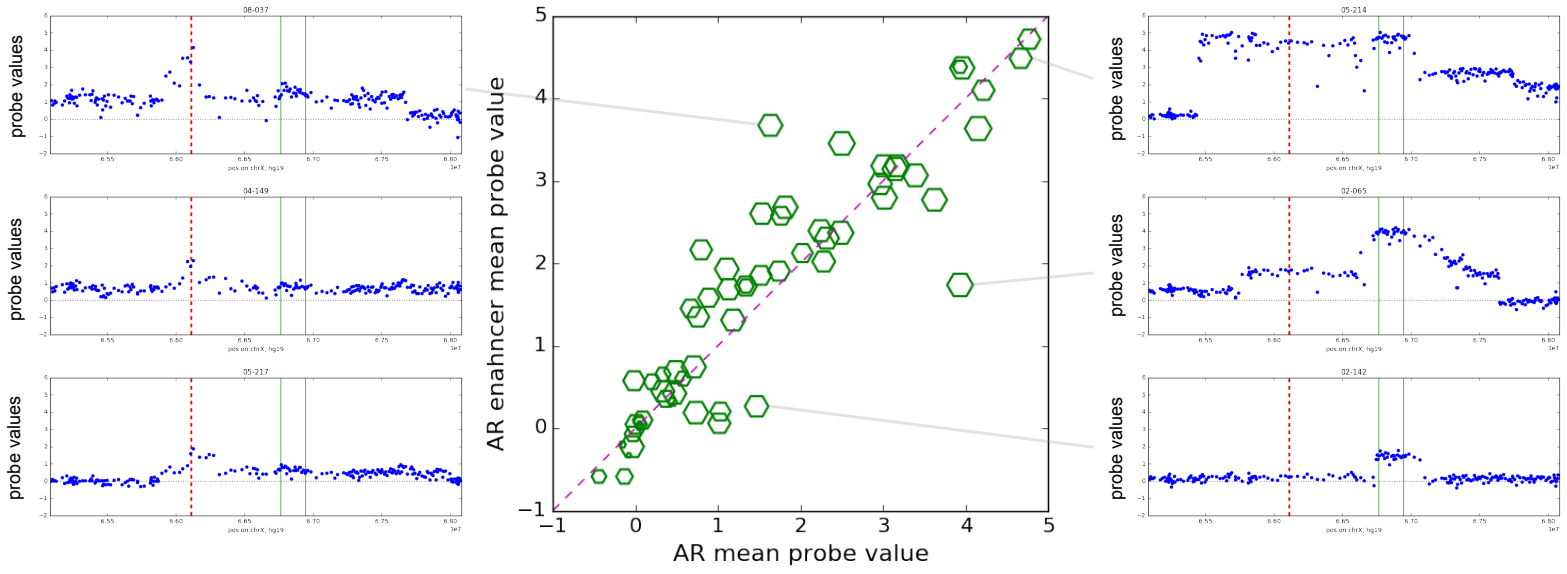**B**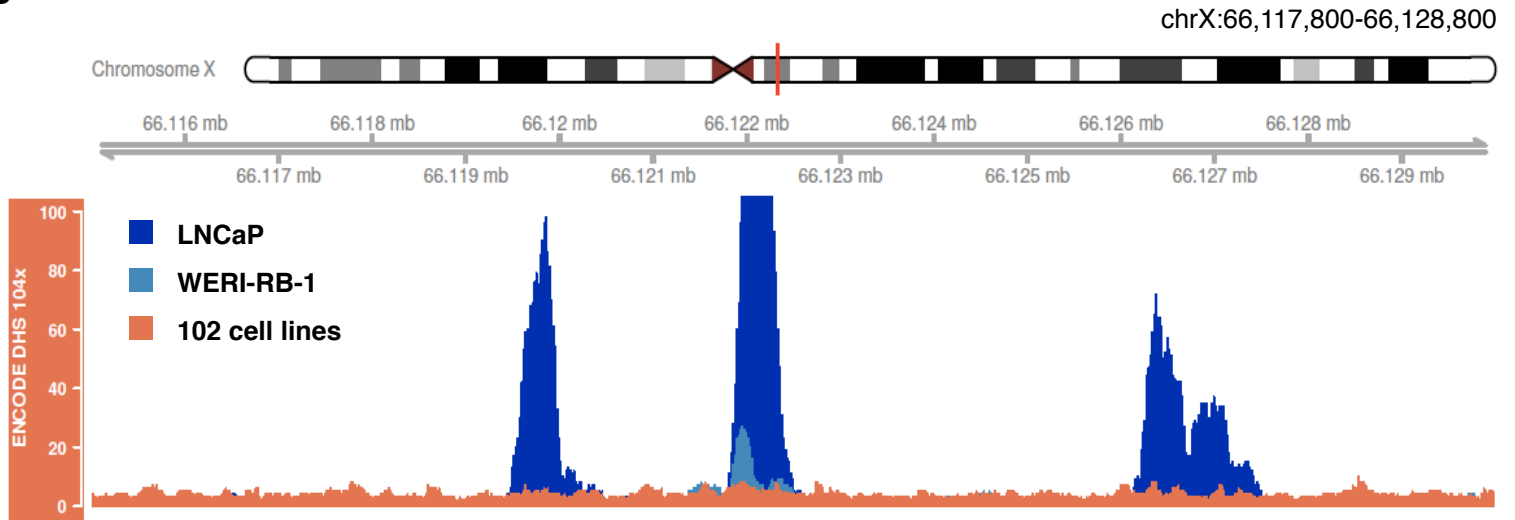**C**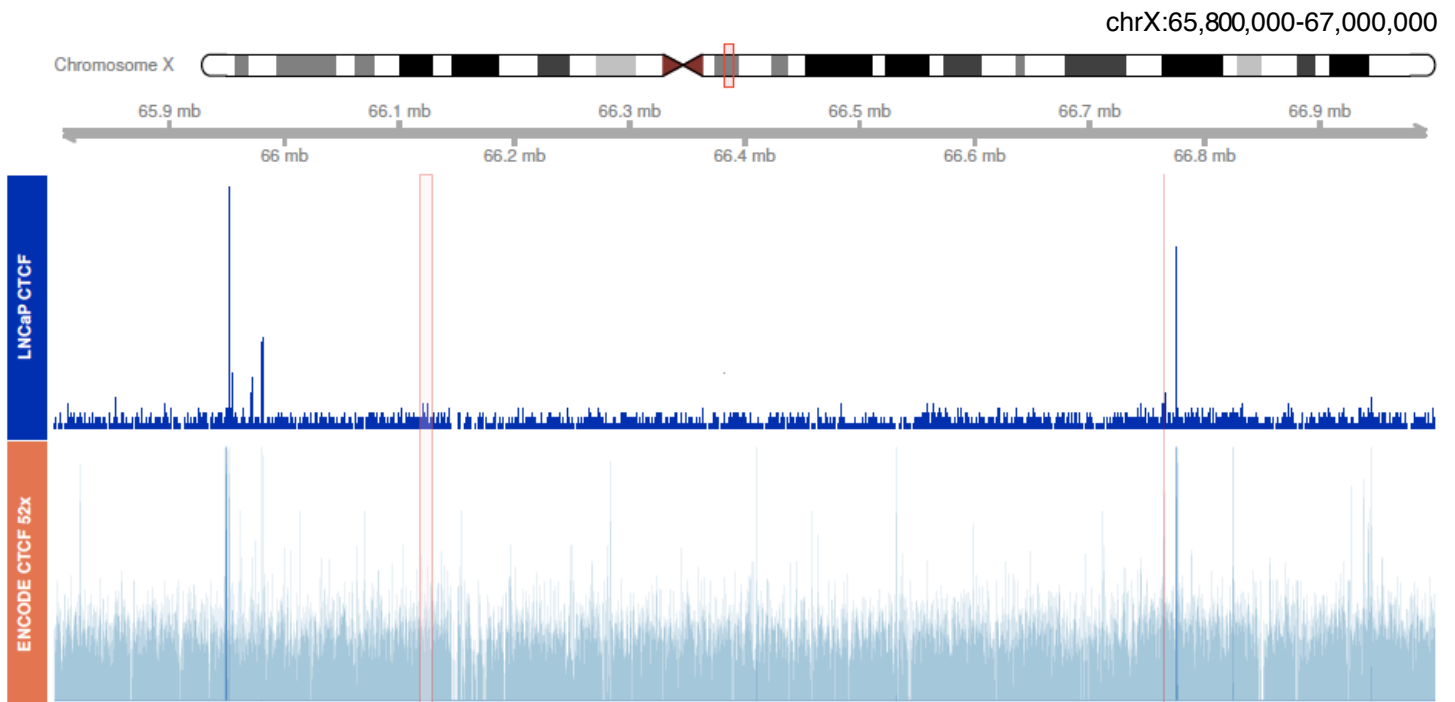

Supplement: NIHMS974232-supplement-1.pdf [file NIHMS974232-supplement-1.pdf]

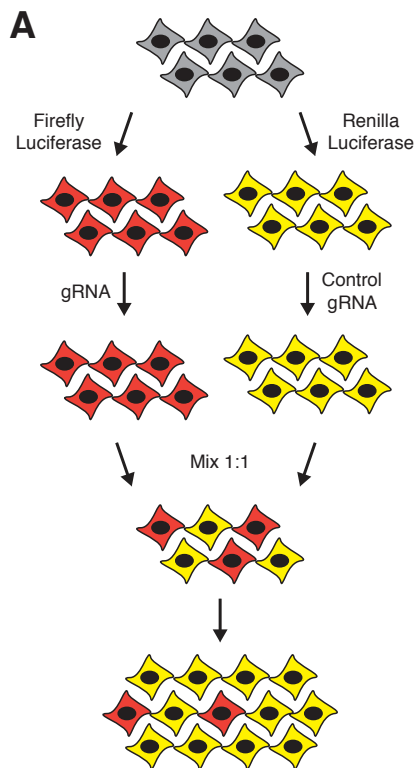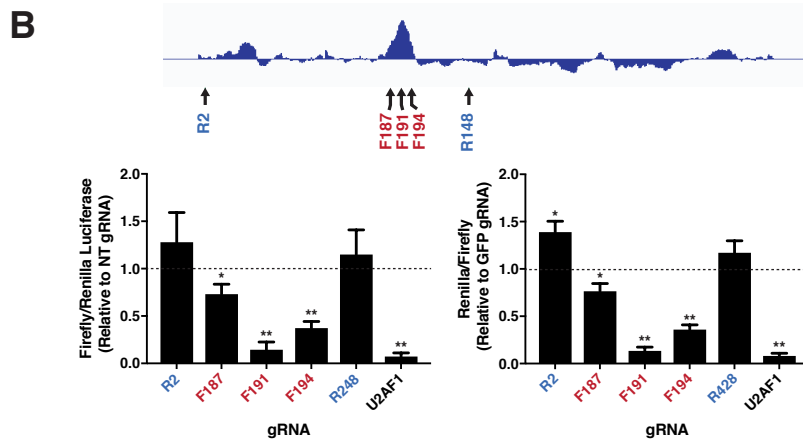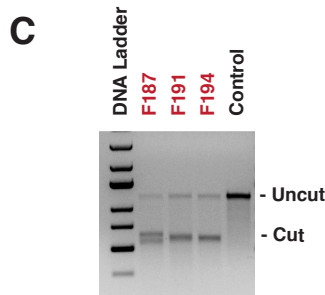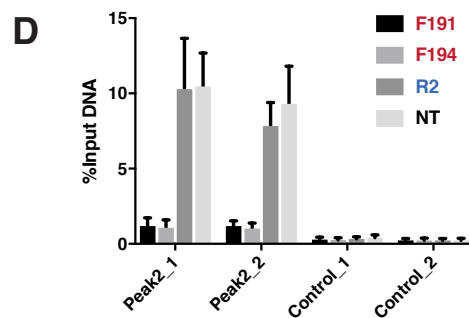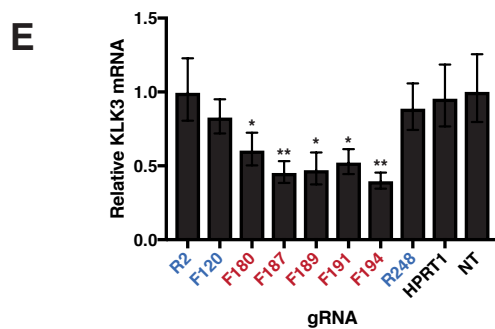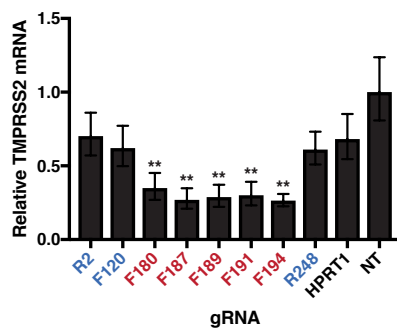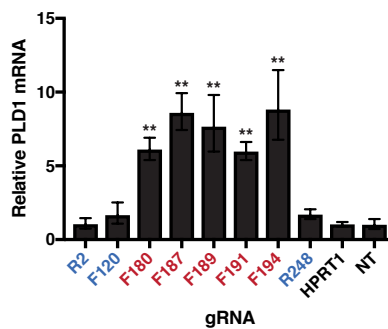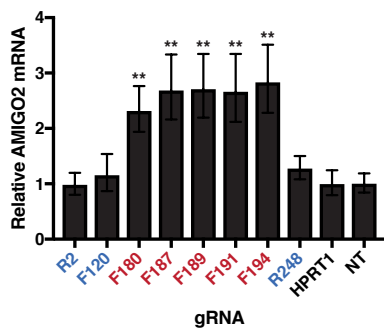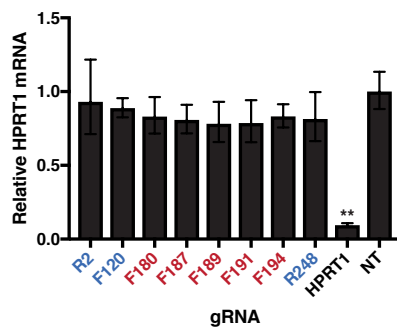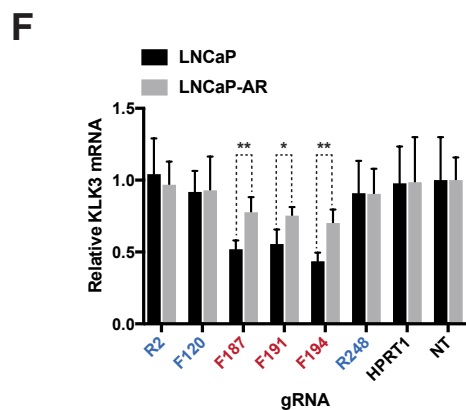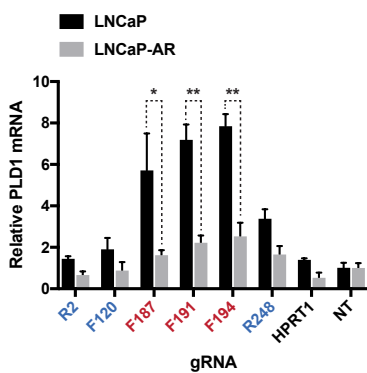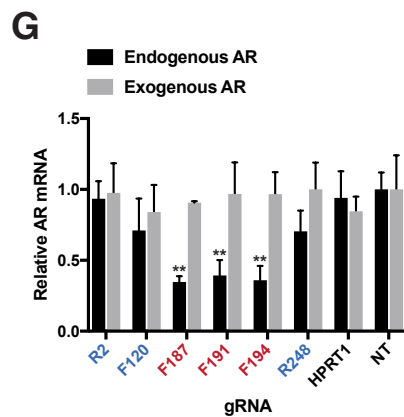

Supplement: NIHMS974232-supplement-2.pdf [file NIHMS974232-supplement-2.pdf]

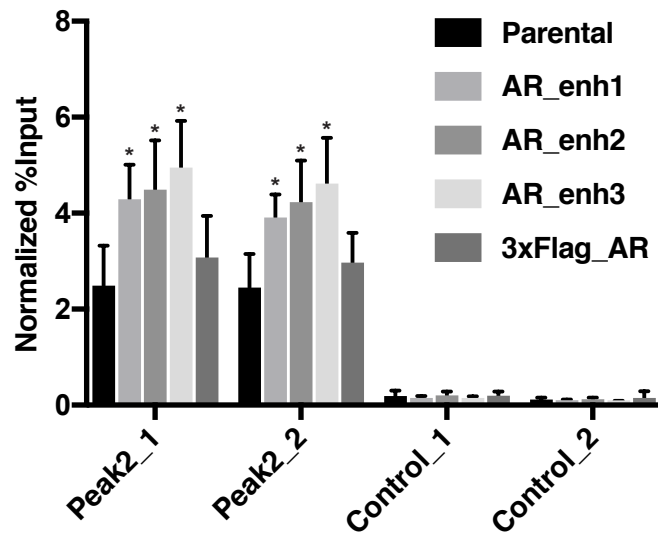

Supplement: NIHMS974232-supplement-3.pdf [file NIHMS974232-supplement-3.pdf]
